# Supplementary material for: Engineering of efficient functionalization in a zirconium-hydroxyl-based metal–organic framework for an ultra-high adsorption of Pb2+ ions from an aqueous medium: an elucidated uptake mechanism
Source: Royal Society of Chemistry journal article supplement (doi:10.1039/d4ma00369a), 2024-01-01
Supplement: d4ma00369a1.pdf [file d4ma00369a1.pdf]

## Supporting information

### **Engineering of efficient functionalization in a zirconium-hydroxyl-based metal-organic framework for ultra-high adsorption of Pb<sup>2+</sup> ion from an aqueous medium: an elucidated uptake mechanism**

Hang M. N. Pham,<sup>a</sup> Anh V. N. Phan,<sup>a</sup> Anh N. T. Phan,<sup>a</sup> Vi P. Nguyen,<sup>a</sup> Khang M. V. Nguyen,<sup>a</sup> Hung N. Nguyen,<sup>a</sup> Thai M. Nguyen<sup>a</sup> and My V. Nguyen<sup>\*a</sup>

<sup>a</sup> Faculty of Chemistry, Ho Chi Minh City University of Education, Ho Chi Minh City, 700000, Vietnam.

\*To whom correspondence should be addressed: [mynv@hcmue.edu.vn](mailto:mynv@hcmue.edu.vn)

**Keywords:** OH-modified Zr-MOFs, Adsorption of Pb<sup>2+</sup>, Heavy metal ion, Uptake mechanism, Treatment of wastewater.

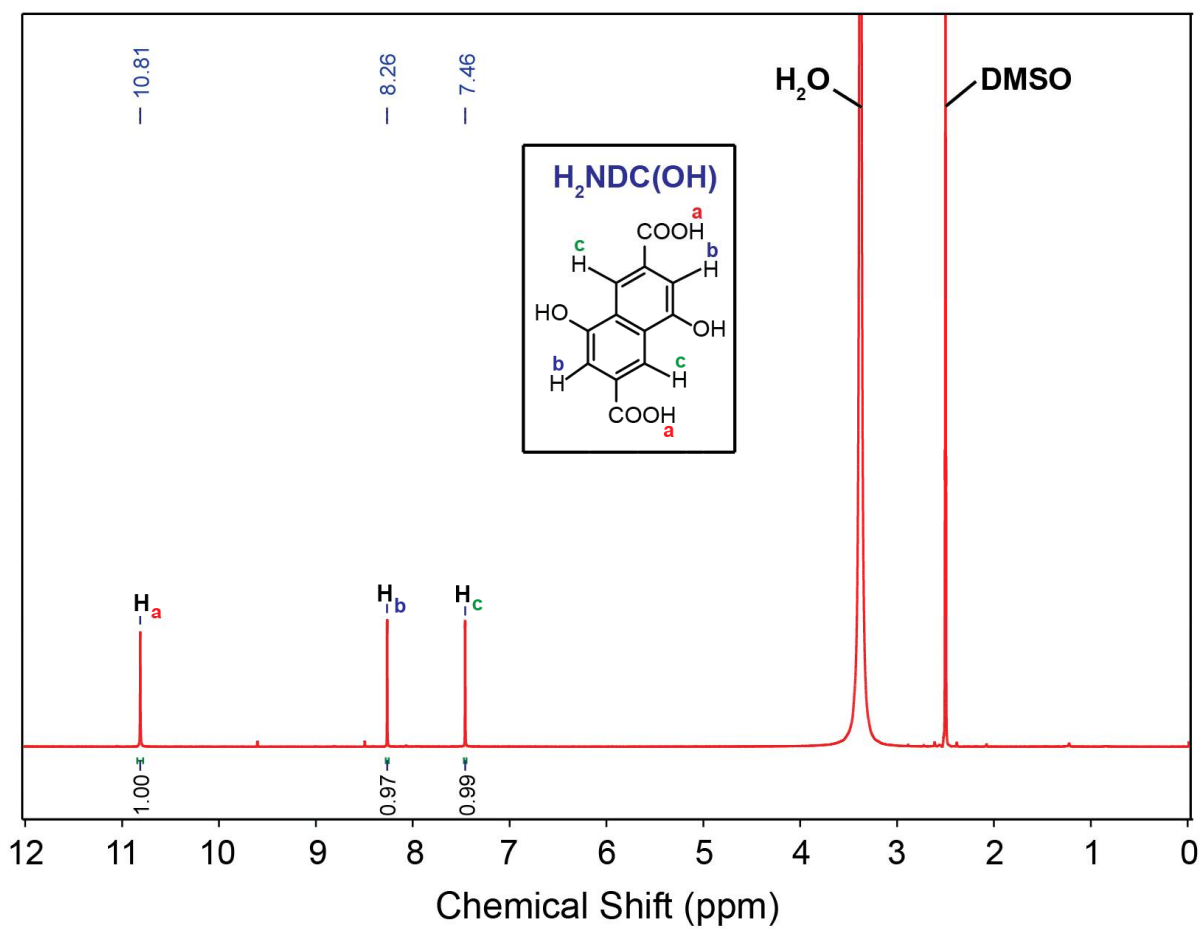

**Figure S1.**  $^1\text{H-NMR}$  spectrum of  $\text{H}_2\text{NDC(OH)}$  linker in DMSO solvent

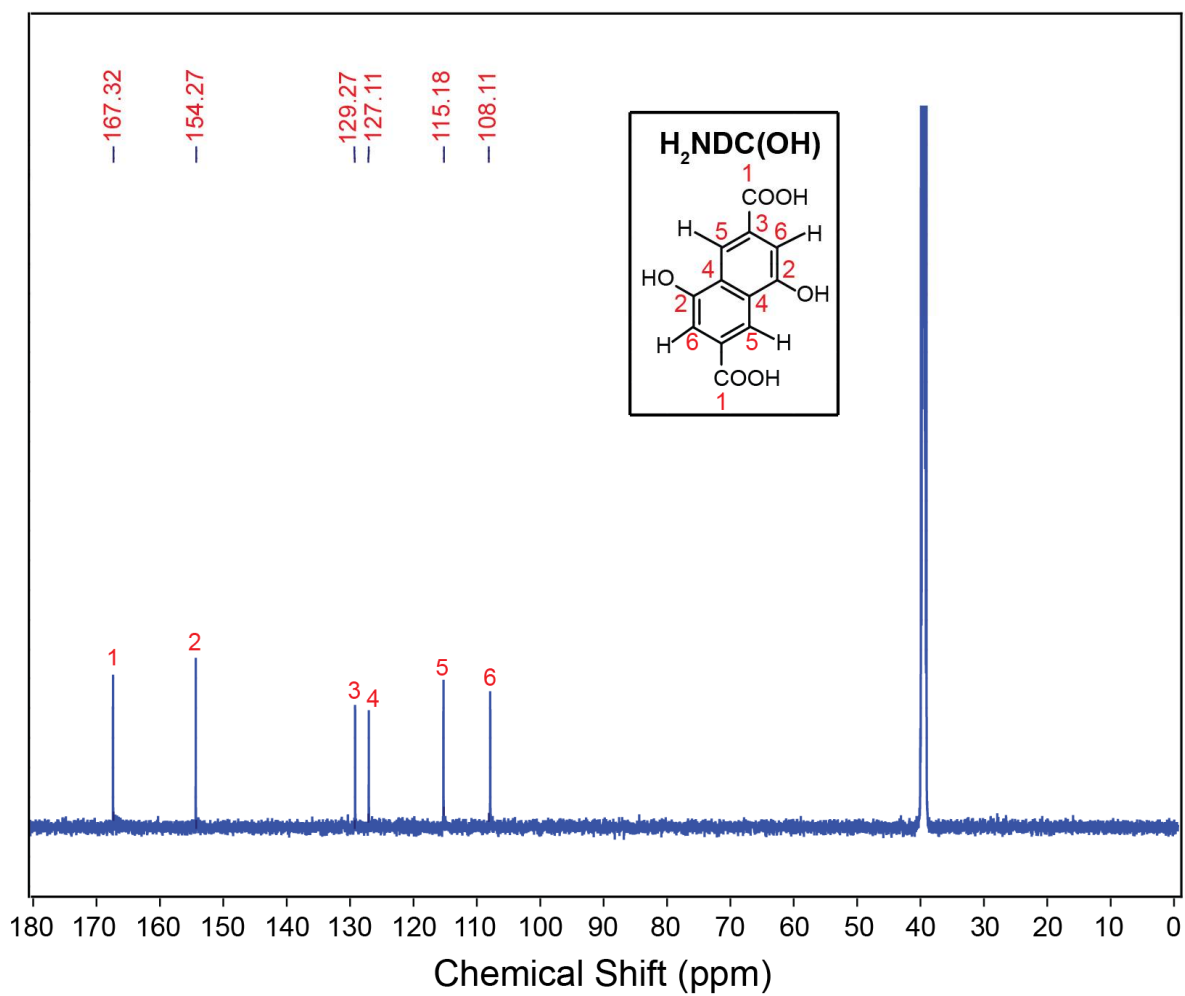

**Figure S2.**  $^{13}\text{C}$ -NMR spectrum of  $\text{H}_2\text{NDC}(\text{OH})$  linker in DMSO solvent

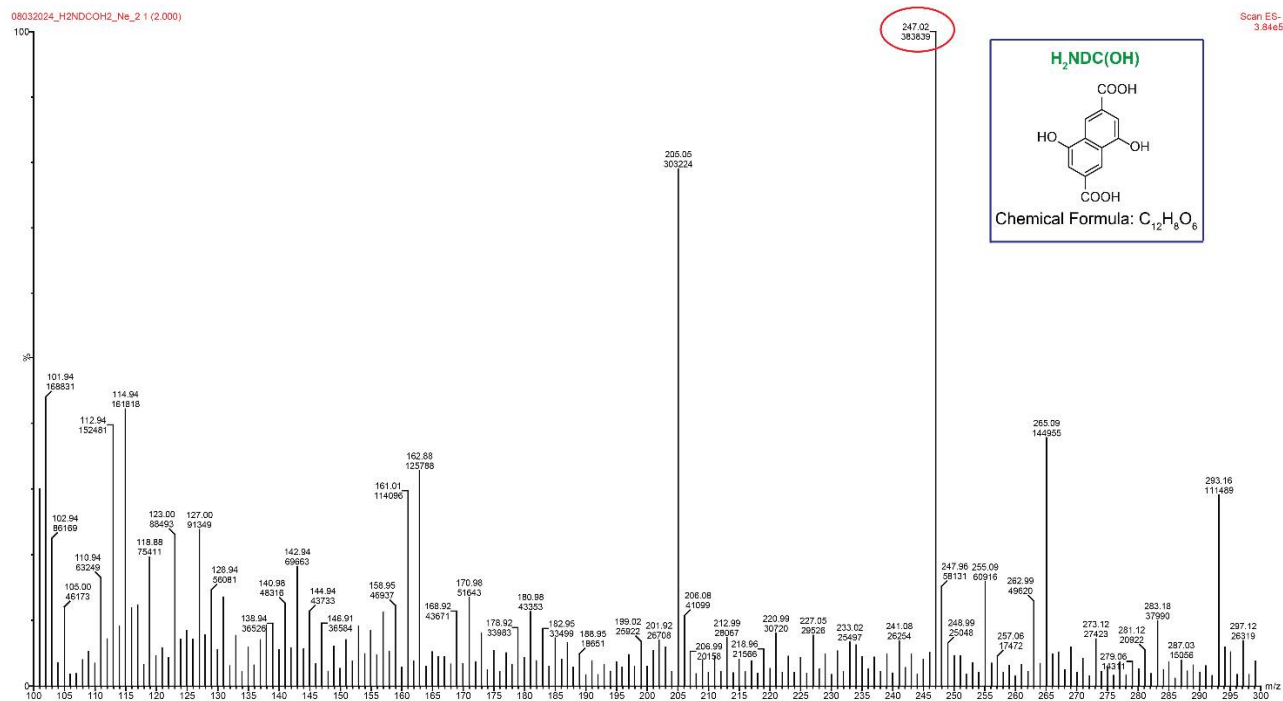

Figure S3. Mass spectroscopy of H<sub>2</sub>NDC(OH) linker

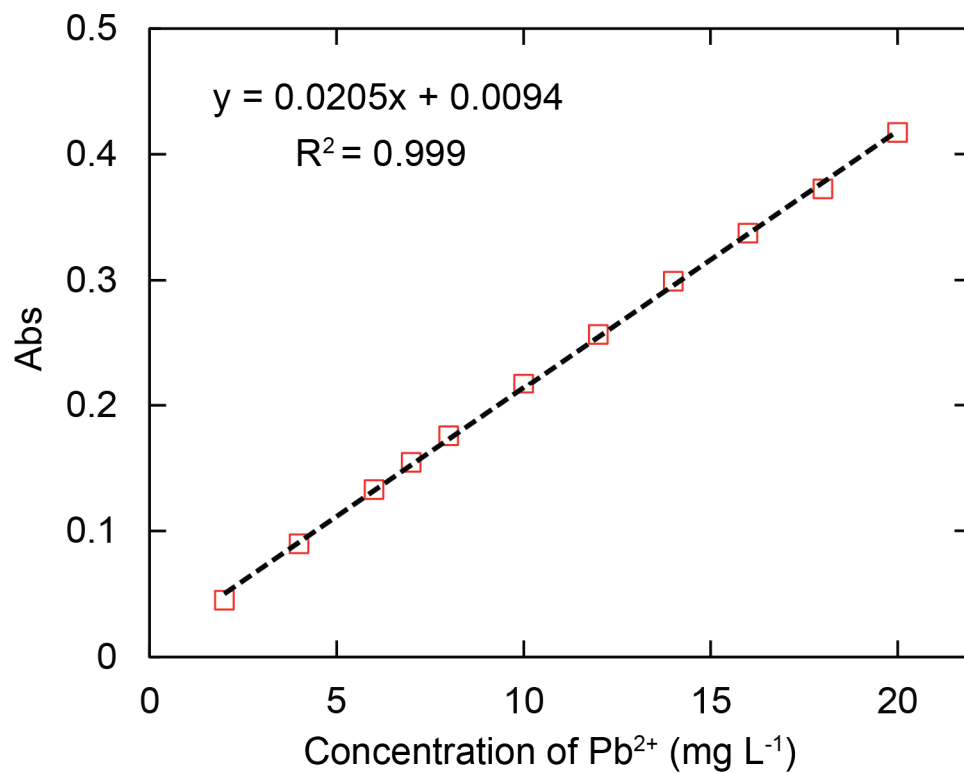

**Figure S4.** The relationship between the absorbed intensity of Pb<sup>2+</sup> and various concentrations of 0 - 20 mg L<sup>-1</sup> by linear fitting

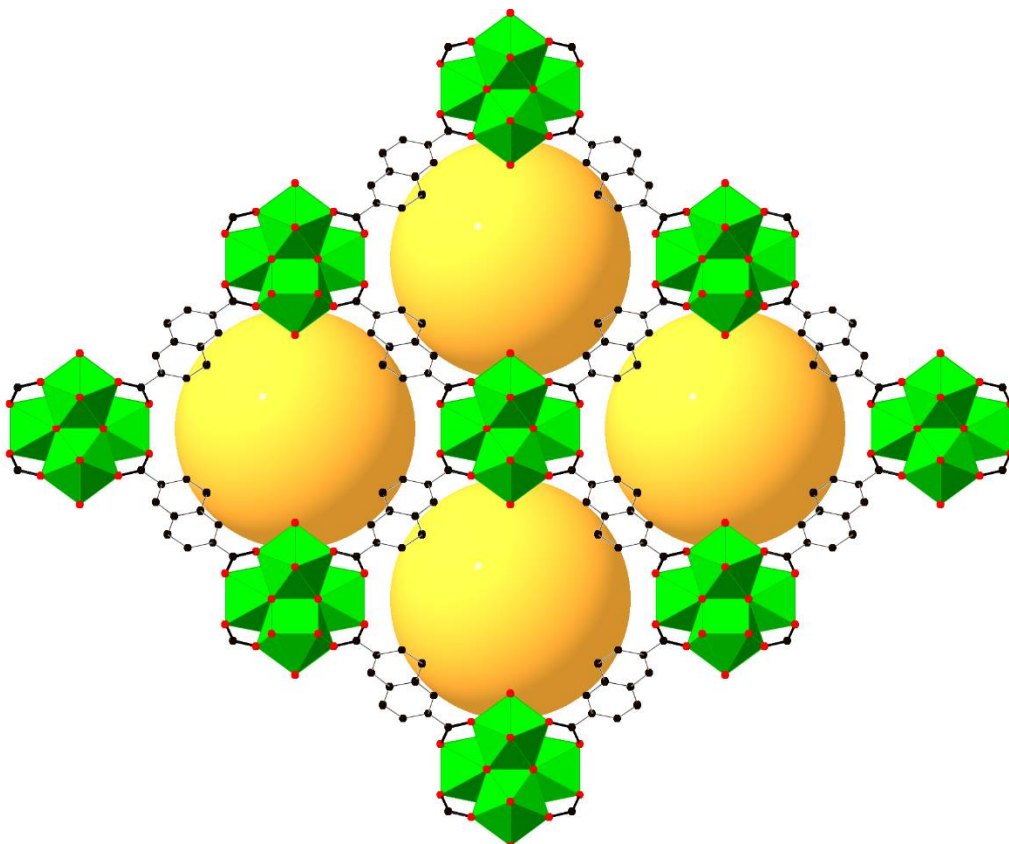

**Figure S5.** The structure of the Zr-bcu-NDC backbones is constructed from the  $\text{Zr}_6\text{O}_8(\text{H}_2\text{O})_8(\text{CO}_2)_8$  SBUs with the  $\text{H}_2\text{NDC}$  linker. Atom colors: Zr polyhedra, green; C, black; O, red. All H atoms are omitted for clarity.

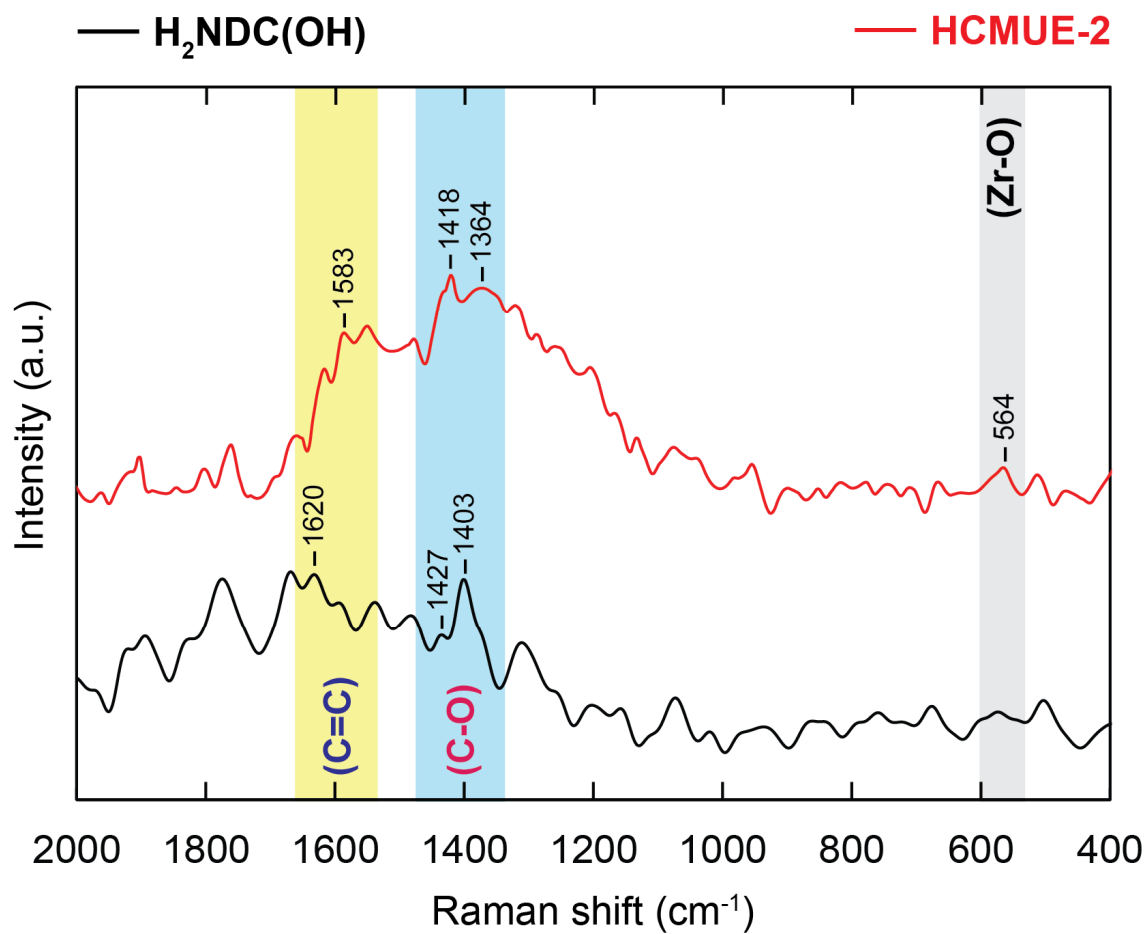

**Figure S6.** Raman spectrum of activated HCMUE-2 (red) in comparison with  $\text{H}_2\text{NDC(OH)}$  linker (black)

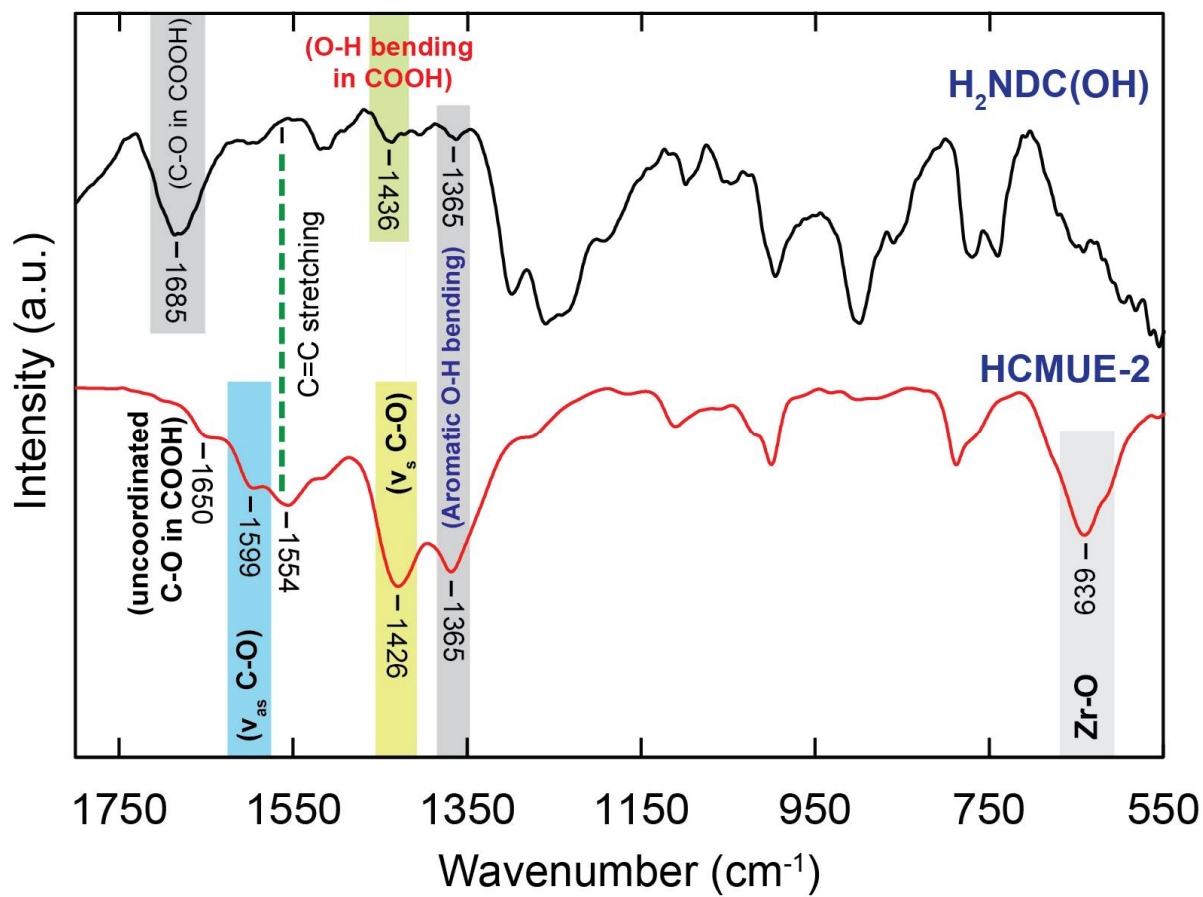

**Figure S7.** The FT-IR spectrum of HCMUE-2 (red) in comparison with H<sub>2</sub>NDC(OH) (black)



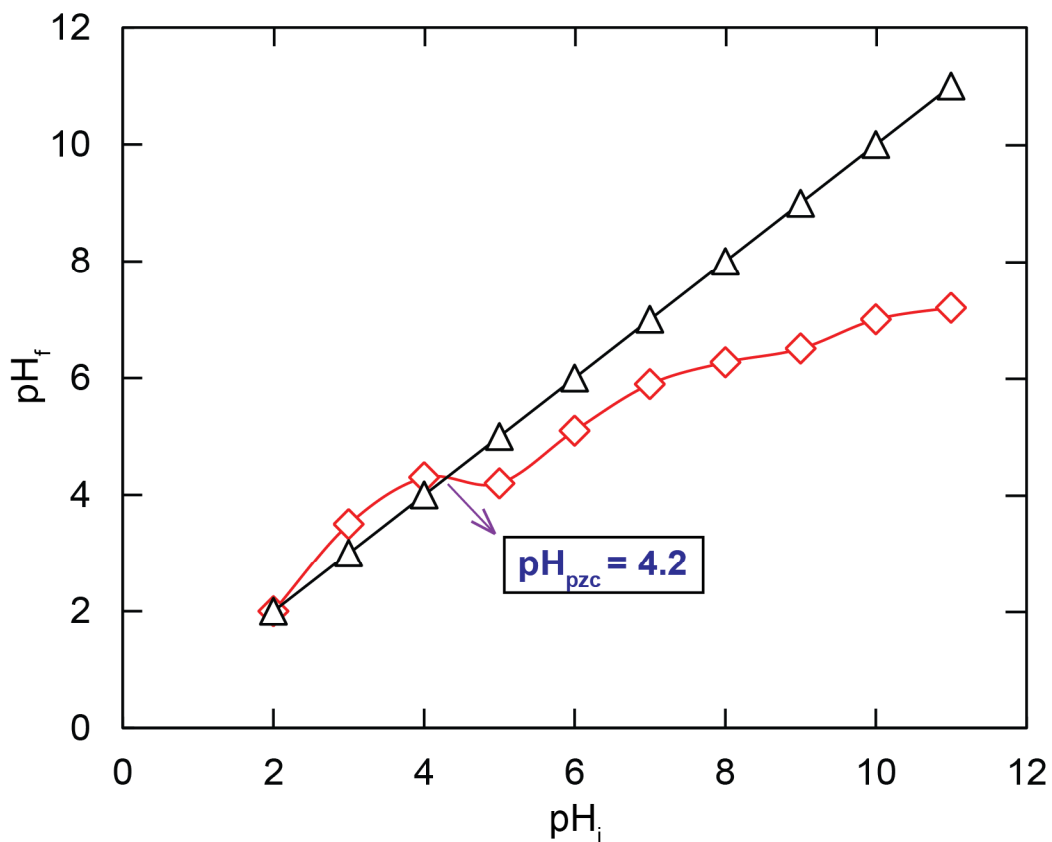

**Figure S8.** The effect of the initial pH on the final pH for determining  $pH_{pzc}$  of HCMUE-2. In detail, HCMUE-2 (150 mg) was introduced to 100 mL of glass bottles containing 50 mL of 0.01 M NaCl solutions with different initial pH ranges ( $pH_i$ ) from 2 to 11. The mixtures were stirred for 48 h. The final pH value ( $pH_f$ ) of the solutions was recorded using a pH meter. The intersection points between  $pH_i$  and  $pH_f$  values exhibited the  $pH_{pzc}$  value

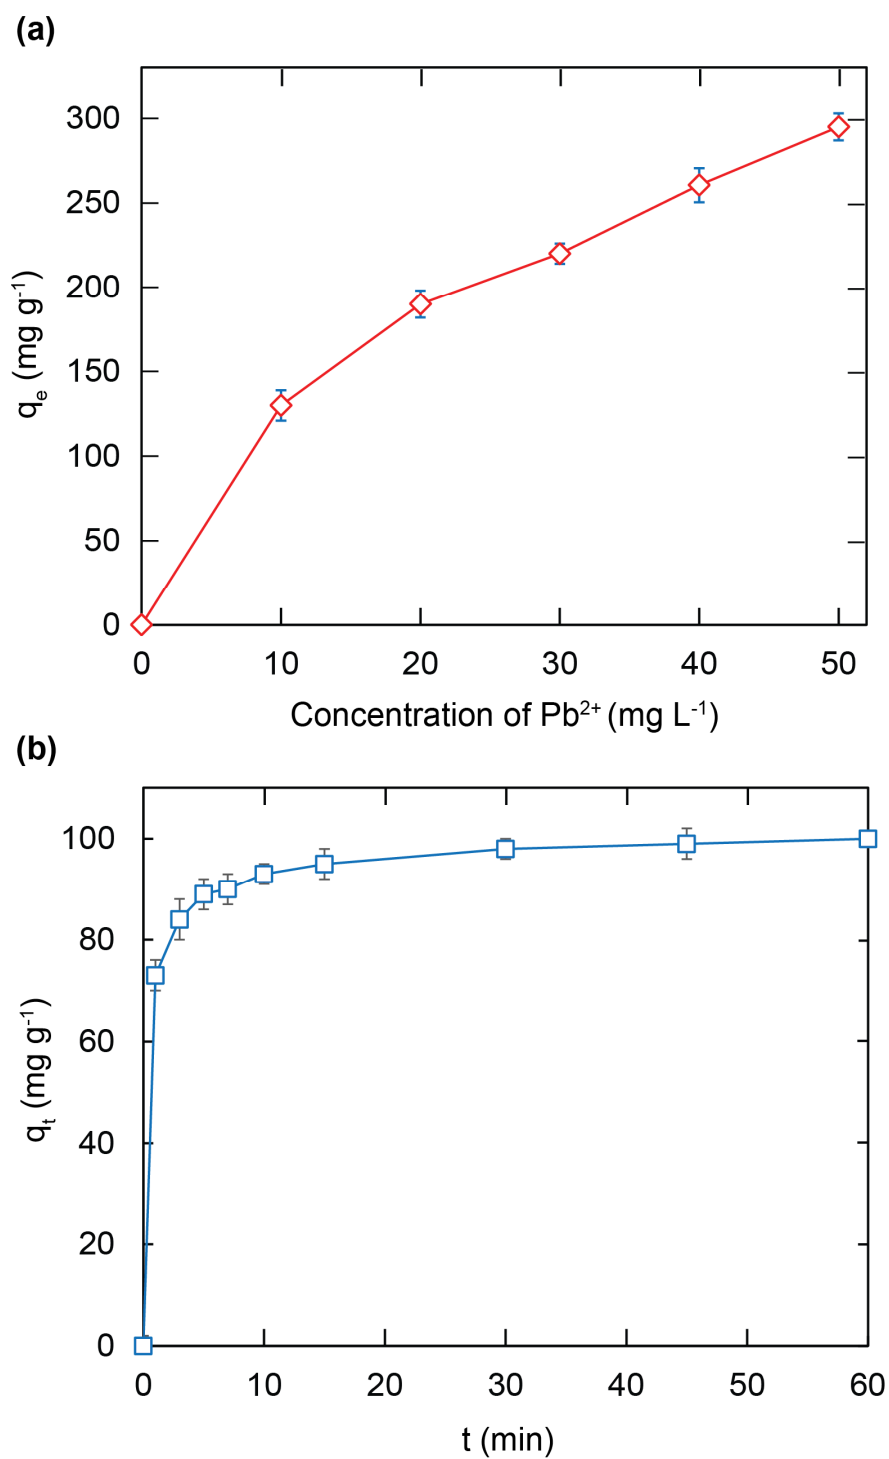

**Figure S9.** Effect of low initial concentrations on the adsorption uptake of  $\text{Pb}^{2+}$  over HCMUE-2 [ $m = 15$  mg,  $V = 100$  mL,  $C_o$ : 10 - 50  $\text{mg L}^{-1}$ , pH = 5.5,  $t = 24$  h] (a); The kinetic curve for the adsorption of  $\text{Pb}^{2+}$  at low concentrations onto HCMUE-2 [ $m = 5$  mg,  $V = 50$  mL,  $C_o = 10$   $\text{mg L}^{-1}$ ,  $t = 1 - 60$  min, pH = 5] (b)

### Adsorption kinetics

The pseudo-first-order, pseudo-second-order, and intra-particle diffusion models are determined the equations (S1), (S2), and (S3):

$$q_t = q_e \cdot (1 - e^{-k_1 t}) \quad (S1)$$

$$\frac{t}{q_t} = \frac{1}{k_2 q_e^2} + \frac{t}{q_e} \quad (S2)$$

$$q_t = k_i t^{1/2} + c \quad (S3)$$

Where  $q_t$  ( $\text{mg g}^{-1}$ ) and  $q_e$  ( $\text{mg g}^{-1}$ ) symbolize the  $\text{Pb}^{2+}$  adsorption capacity at  $t$  and equilibrium time, respectively.  $k_1$  ( $\text{min}^{-1}$ ),  $k_2$  ( $\text{g mg}^{-1} \text{min}^{-1}$ ), and  $k_i$  ( $\text{g mg}^{-1} \text{min}^{-1}$ ) represent the rate constants of pseudo-first-order, pseudo-second-order, and intra-particle diffusion models, and  $c$  is the constant, exhibiting the boundary layer thickness.
